# Supplementary material for: Versatile Strategy for Electrophoretic Deposition of Polyvinylidene Fluoride-Metal Oxide Nanocomposites
Source: MDPI journal article supplement (doi:10.3390/ma14247902), 2021-12-20
Supplement: s1 [file s1]

# Versatile Strategy for Electrophoretic Deposition of Polyvinylidene Fluoride-Metal Oxide Nanocomposites

Qinfu Zhao <sup>1</sup>, Xinqian Liu <sup>1</sup>, Stephen Veldhuis <sup>2</sup> and Igor Zhitomirsky <sup>1,\*</sup>

<sup>1</sup> Department of Materials Science and Engineering, McMaster University, Hamilton, ON L8S 4L7, Canada; zhaoq36@mcmaster.ca (Q.Z.); liux234@mcmaster.ca (X.L.); zhitom@mcmaster.ca (I.Z.)

<sup>2</sup> Department of Mechanical Engineering, McMaster University, Hamilton, ON L8S 4L7, Canada; veldhu@mcmaster.ca

\*Correspondence: zhitom@mcmaster.ca

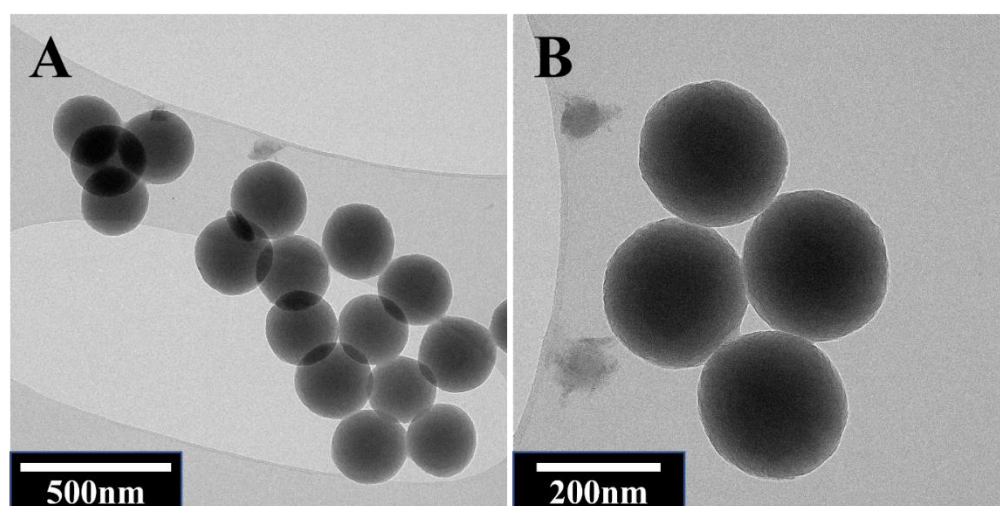

**Figure S1.** TEM images at different magnifications of as-received PVDF particles.

**Citation:** Zhao, Q.; Liu, X.; Veldhuis, S.; Zhitomirsky, I. Versatile Strategy for Electrophoretic Deposition of Polyvinylidene Fluoride-Metal Oxide Nanocomposites. *Materials* **2021**, *14*, 7902. <https://doi.org/10.3390/ma14247902>

Academic Editor: Andrei V. Petukhov

**Publisher's Note:** MDPI stays neutral with regard to jurisdictional claims in published maps and institutional affiliations.

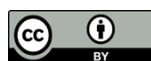

**Copyright:** © 2021 by the authors. Licensee MDPI, Basel, Switzerland. This article is an open access article distributed under the terms and conditions of the Creative Commons Attribution (CC BY) license (<https://creativecommons.org/licenses/by/4.0/>).

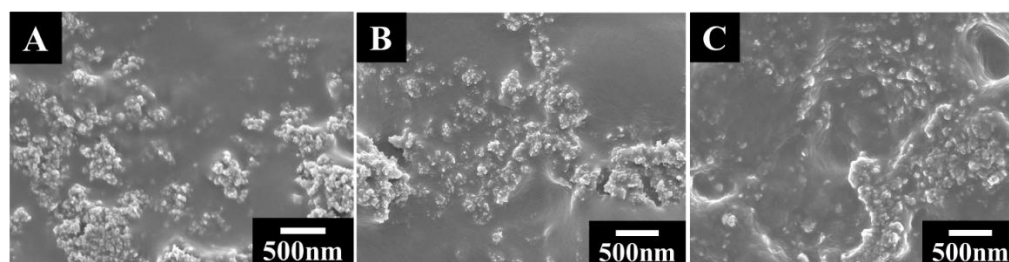

**Figure S2.** SEM images of films, prepared from 5 g L<sup>−1</sup> PVDF solutions, containing (A) 1 g L<sup>−1</sup> CA and 1 g L<sup>−1</sup> MnO<sub>2</sub>, (B) 1 g L<sup>−1</sup> CV and 1 g L<sup>−1</sup> TiO<sub>2</sub>, (C) 1 g L<sup>−1</sup> CV and 1 g L<sup>−1</sup> NiFe<sub>2</sub>O<sub>4</sub> at a deposition voltage of 50 V annealed at 200°C.
